# Supplementary material for: Group size and modularity interact to shape the spread of infection and information through animal societies
Source: bioRxiv or medRxiv preprint supplement (doi:10.1101/2021.05.01.442253), 2021-05-01

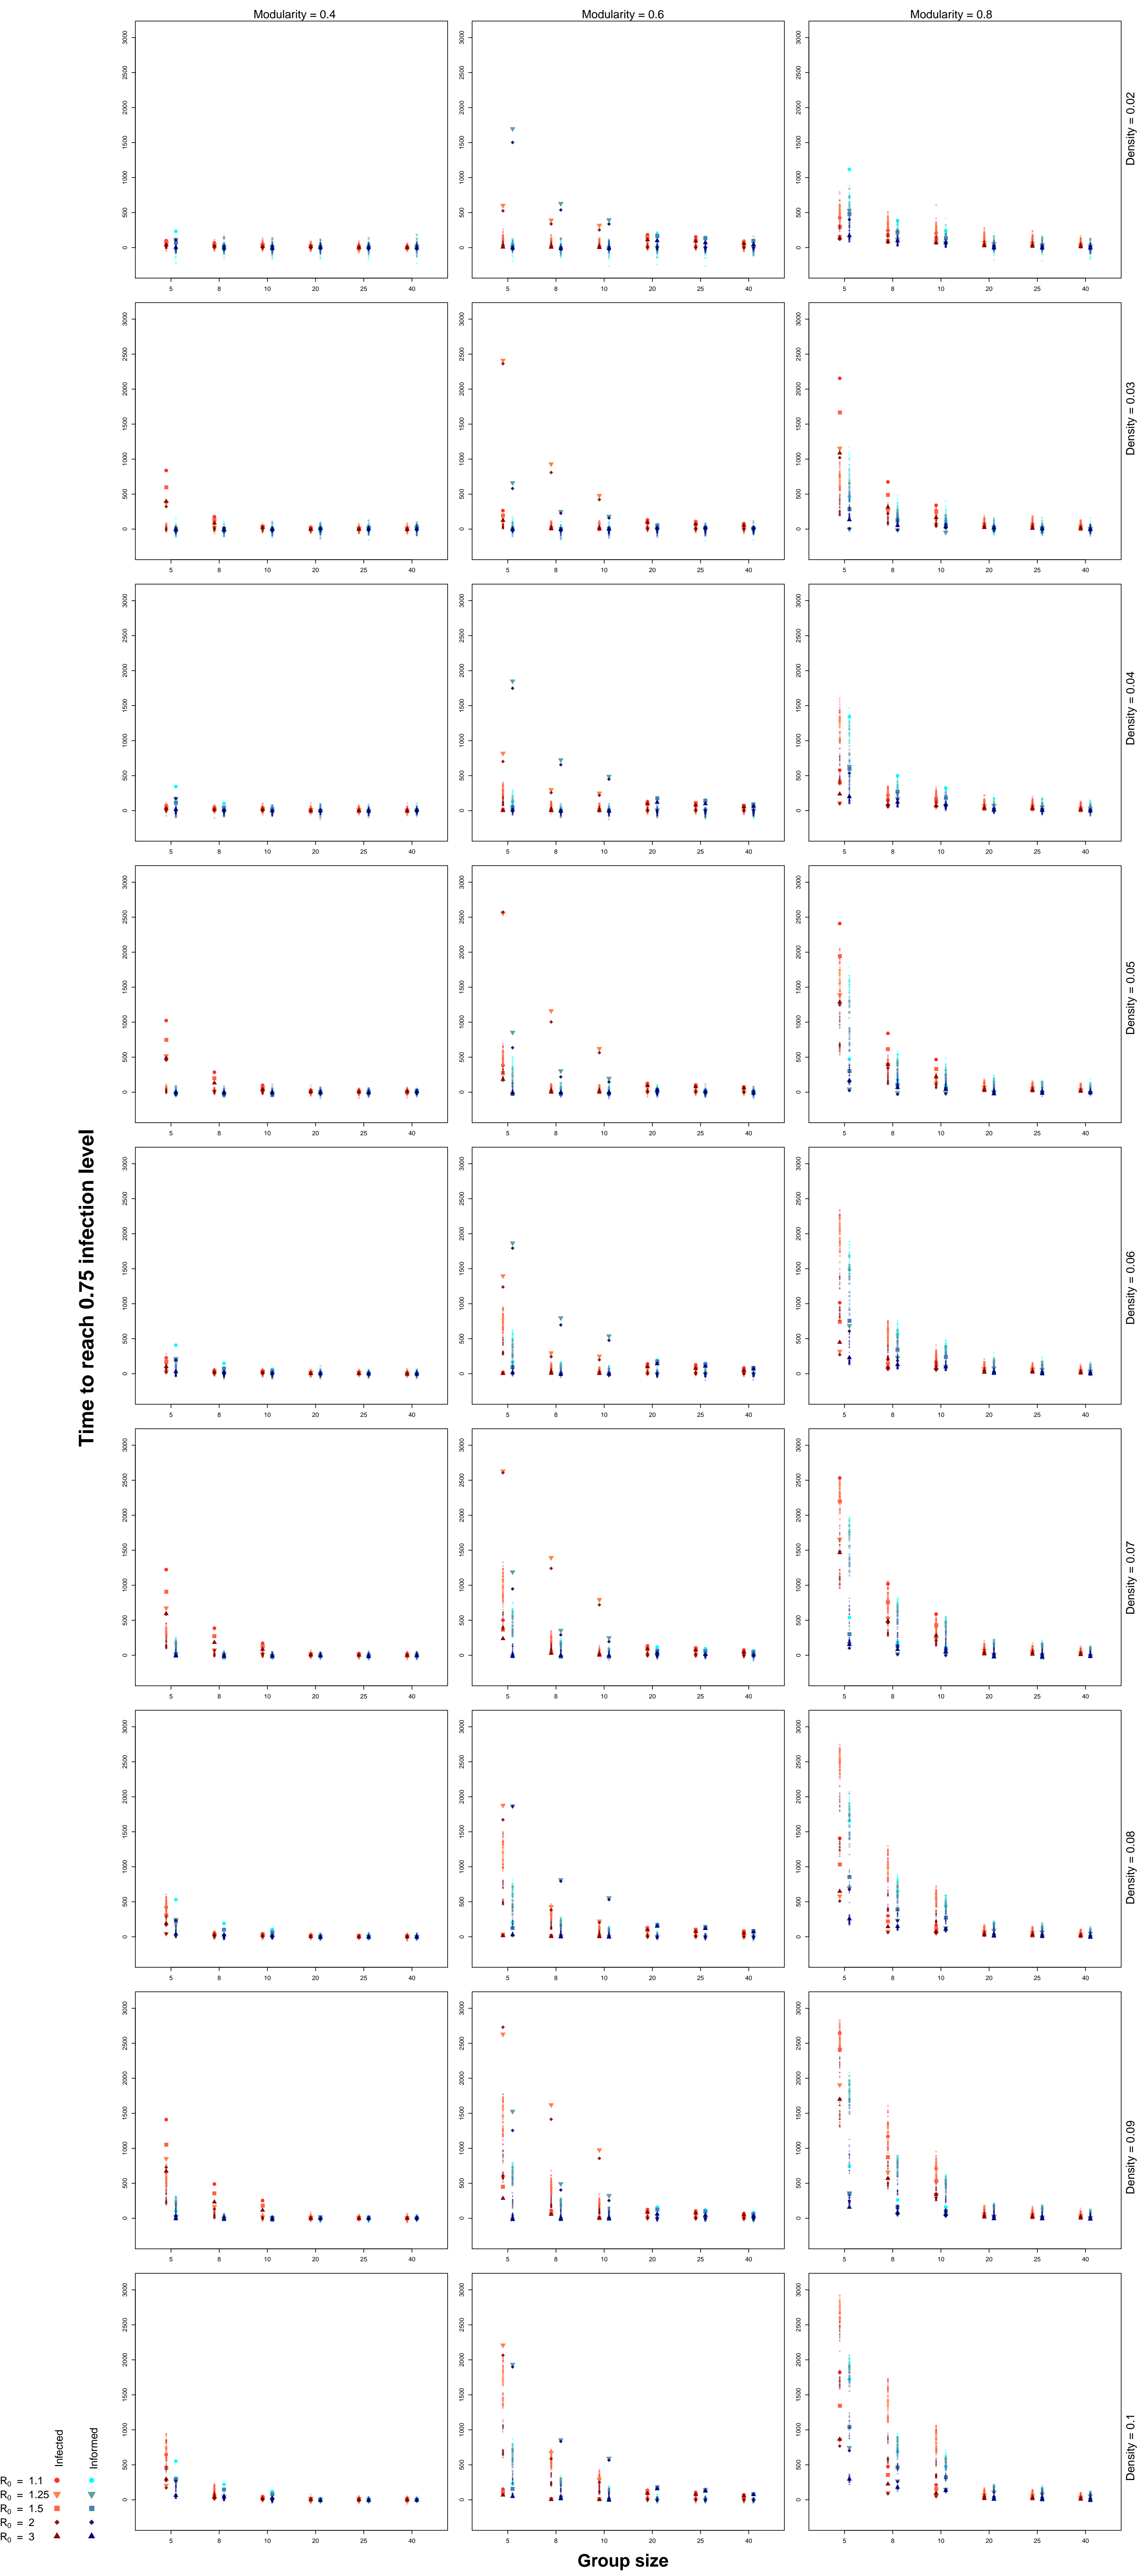

Supplement: Supplementary file [file media-3.pdf]
